# Supplementary material
Source: publisher figshare collection journal article supplement (https://gsapubs.figshare.com/articles/dataset/_/22310293)
Supplement: Supplementary file 1 [file 1]

Li, Y., et al., 2023, Revised onset age of magnetochron M0r: Chronostratigraphic and geologic implications: *Geology*, <https://doi.org/10.1130/G50873.1>.

## Supplemental Material

**Text S1:** U–Pb,  $^{40}\text{Ar}/^{39}\text{Ar}$ , and Bayesian modeling analytical methods.

**Table S1:** Summary of radioisotopic ages from Qingshan Group, Jiaolai Basin, China.

**Table S2:** Summary of ages determined for Barremian-Aptian boundary and Chron M0r.

**Tables S3, S4, and S5:** Complete U–Pb CA-IDIRMS, CA-IDTIMS and  $^{40}\text{Ar}/^{39}\text{Ar}$  data in three different labs.

# Timing of magnetochron M0r, the Barremian-Aptian boundary, and geologic implications: SUPPLEMENTARY MATERIALS

## SUPPLEMENTAL MATERIALS

### METHODS

#### U–Pb ANALYTICAL METHODS

The analytical procedure in the Department of Earth and Planetary Sciences at the University of California, Davis (UCD) is as follows. Zircon grains were firstly annealed at 900° for 48 h to restore the crystallinity of the low to medium radiation damaged parts ([Mattinson, 2005](#)). Then the U-Pb laser-ablation screening analyses were performed to exclude any detrital or inherited zircon grains, and the youngest populations of zircons were selected for the subsequent CA-ID-IRMS analysis. Individual zircon crystals were transferred into 3 ml PFA vials, rinsed in acetone followed by 3 M HNO<sub>3</sub>. Individual zircon crystals were loaded into separate microcapsules, and then ~3 µL of 3 M HNO<sub>3</sub> and ~100 µL of concentrated HF were added. The samples were leached in a pressurized vessel at 190° for 15 h ([Huyskens et al., 2016](#)). The residual zircons were then transferred into the corresponding PFA vials and rinsed with MilliQ water, followed by 6 M HCl on a hotplate. Subsequently, the crystals were rinsed with MilliQ water and 3 M HNO<sub>3</sub>. For dissolution at 220° for 48 h, the residual grains were placed into the individual microcapsules, and then ~3 µL of 3 M HNO<sub>3</sub> and ~100 µL of concentrated HF were added as well as a mixed <sup>202</sup>Pb-<sup>205</sup>Pb-<sup>233</sup>U-<sup>236</sup>U tracer solution ([Huyskens et al., 2016](#)). After dissolution, the solutions were dried down and redissolved in 2.5 M HCl overnight, and then Pb and U were separated from the matrix elements by standard HCl ion exchange chemistry ([Krogh,](#)

1973). The Pb and U isotopic measurement were performed on the Triton PLUS TIMS and the Neptune Plus Multi-collector inductively-coupled plasma mass spectrometer (MC-ICP-MS) using an ESI APEX introduction system, respectively. U-Pb dates and uncertainties were calculated using the algorithms of Schmitz and Schoene (2007) and the U decay constants of Jaffey et al. (1971). The weighted mean  $^{206}\text{Pb}/^{238}\text{U}$  ages were calculated using Isoplot excel macro Ludwig (2012). More details of the analytical methods can be found in Liao et al. (2020). The Temora zircon reference material yielded a  $^{206}\text{Pb}/^{238}\text{U}$  age of  $417.48 \pm 0.11$  Ma (MSWD = 1.2, n = 4) during the course of this study.

The analytical procedure in the Department of Geosciences at the Boise State University (BSU) is as follows. Zircon grains were placed in a muffle furnace at 900 °C for 60 h to anneal minor radiation damage. Individual grains were hand-picked, mounted, polished, and imaged by cathodoluminescence (CL) on a JEOL JSM-300 scanning electron microscope and Gatan MiniCL. Based on the compiled images, the sites of spot analyses were selected for laser ablation–inductively coupled plasma–mass spectrometry (LA-ICPMS) using a X-Series II quadrupole ICP-MS and New Wave Research UP-213 Nd:YAG UV (213 nm) laser ablation system following methodology of Macdonald et al. (2018). Based on LA-ICPMS data and CL images, single zircon grains were selected for CA-IDTIMS analysis. Individual zircon grains were chemically abraded in concentrated HF for 12 h at 190 °C to mitigate open system behavior and remove inclusions (Mattinson, 2005). Then the zircon fragments were dissolved in Parr bombs in 29 M HF at 220 ° for 48 h, and spiked with EARTHTIME mixed  $^{202}\text{Pb}$ - $^{205}\text{Pb}$ - $^{233}\text{U}$ - $^{235}\text{U}$  (ET2535) isotope dilution tracer. Dissolved zircon solutions were subsequently dried to fluorides, and re-dissolved in 6 M HCL at 180 °C for 12 h. U and Pb were separated and isolated by anion exchange column chromatography using 50 µl columns and AG-1 X8 resin (Krogh,

1973). Isotope ratios were measured using GV instruments IsoProbe-T multicollector thermal ionization mass spectrometer. U-Pb dates and uncertainties were calculated using the algorithms of [Schmitz and Schoene \(2007\)](#) and the U decay constants of [Jaffey et al. \(1971\)](#).

#### **$^{40}\text{Ar}/^{39}\text{Ar}$ ANALYTICAL METHODS**

Sanidine crystals (200–350  $\mu\text{m}$ ) were wrapped in aluminum foil, alongside the Fish Canyon sanidine (FCs) standard, into 2.4-cm aluminum disks. The disks were irradiated in the Cadmium-Lined-In Core-Irradiation Tube (CLICIT) for 80 hours at the Oregon State University reactor.  $^{40}\text{Ar}/^{39}\text{Ar}$  single crystal total fusion analyses were performed using a 60 W  $\text{CO}_2$  laser at the University of Wisconsin-Madison WiscAr laboratory. The extracted gases were cleaned with one SAES GP-50 getter for 60 s and a cryotrap at  $-125^\circ\text{C}$  for 30 s, and then measured using a Nu Instruments Noblesse multi-collector mass spectrometer following procedures of [Jicha et al. \(2016\)](#). Argon beam intensities were corrected for the baseline, blank, radioactive decay, and detector intercalibration, the latter of which was done using an in-house cocktail gas [Jicha et al. \(2016\)](#). The  $^{40}\text{Ar}/^{39}\text{Ar}$  weighted mean ages were calculated relative to  $28.201 \pm 0.046$  Ma FCs ([Kuiper et al. 2008](#)) with the  $^{40}\text{K}$  decay constant [Min et al. 2000](#). The atmospheric  $^{40}\text{Ar}/^{36}\text{Ar}$  value was used from [Lee et al. \(2006\)](#), and the complete  $^{40}\text{Ar}/^{39}\text{Ar}$  isotope data are available in [Table S1](#).

#### **BAYESIAN MODELING**

Bayesian age-depth model is generated using the modifiedBChron package of [Trayler et al. \(2020\)](#). The positions of four tuffs in the model represent their height above the base of the Houkuang Formation. A 5 m thickness was assumed for each tuff, and age-depth positions were predicted every 5 m. The dates used to determine the weighted mean age in [Figure 2](#) are chosen as inputs to produce the probability distribution for each sample. All  $^{206}\text{Pb}/^{238}\text{U}$  and  $^{40}\text{Ar}/^{39}\text{Ar}$

dates were integrated into four tuff age likelihood inputs into the Bayesian modeling. The median age-depth model is generated with ten thousand age-depth paths using Markov Chain Monte Carlo technique, and presented as 95% highest density interval (HDI), which is analogous to  $2\sigma$  uncertainty (Trayler et al., 2020). The posterior distributions superimposed in black on the original likelihoods in color (Figure 2).

## METHODS REFERENCES

- Huyskens, M.H., Zink, S., and Amelin, Y., 2016, Evaluation of temperature-time conditions for the chemical abrasion treatment of single zircons for U-Pb geochronology: *Chemical Geology*, v. 438, p. 25–35, <https://doi.org/10.1016/j.chemgeo.2016.05.013>.
- Jaffey, A., Flynn, K., Glendenin, L., Bentley, W.T., and Essling, A., 1971, Precision measurement of half-lives and specific activities of  $^{235}\text{U}$  and  $^{238}\text{U}$ : *Physical Review C*, v. 4, P. 1889, <https://doi.org/10.1103/PhysRevC.4.1889>.
- Jicha, B.R., Singer, B.S., and Sobol, P., 2016, Re-evaluation of the ages of  $^{40}\text{Ar}/^{39}\text{Ar}$  sanidine standards and supereruptions in the western U.S. using a Noblesse multi-collector mass spectrometer: *Chemical Geology*, v. 431, p. 54–66, doi:10.1016/j.chemgeo.2016.03.024.
- Krogh, T.E., 1973, A low-contamination method for hydrothermal decomposition of zircon and extraction of U and Pb for isotopic age determinations: *Geochimica et cosmochimica acta*, v. 37, p. 485–494, [https://doi.org/10.1016/0016-7037\(73\)90213-5](https://doi.org/10.1016/0016-7037(73)90213-5).
- Kuiper, K.F., Deino, A., Hilgen, F.J., Krijgsman, W., Renne, P.R., and Wijbrans, J.R., 2008, Synchronizing rock clocks of Earth history: *Science*, v. 320, p. 500–504, <https://doi.org/10.1126/science.1154339>.
- Lee, J.Y., Marti, K., Severinghaus, J.P., Kawamura, K., Yoo, H.S., Lee, J.B., and Kim, J.S., 2006, A redetermination of the isotopic abundances of atmospheric Ar: *Geochimica et Cosmochimica Acta*, v. 70, p. 4507–4512, <https://doi.org/10.1016/j.gca.2006.06.1563>.
- Liao, S.Y., Huyskens, M.H., Yin, Q.Z., and Schmitz, B., 2020, Absolute dating of the L-chondrite parent body breakup with high-precision U–Pb zircon geochronology from Ordovician limestone: *Earth and Planetary Science Letters*, v. 547, p.116442, <https://doi.org/10.1016/j.epsl.2020.116442>.

- Ludwig, K., 2012, A Geochronological toolkit for Microsoft Excel. Berkeley Geochronology Center, Special Publications.
- Macdonald, F.A., Schmitz, M.D., Strauss, J.V., Halverson, G.P., Gibson, T.M., Eyster, A., Cox, G., Mamrol, P., and Crowley, J.L., 2018, Cryogenian of Yukon: Precambrian Research, v. 319, p. 114–143, <https://doi.org/10.1016/j.precamres.2017.08.015>.
- Mattinson J.M., 2005, Zircon U–Pb chemical abrasion (“CA-TIMS”) method: Combined annealing and multi-step partial dissolution analysis for improved precision and accuracy of zircon ages: Chemical Geology, v. 220, p. 47–66, <https://doi.org/10.1016/j.chemgeo.2005.03.011>.
- Min, K., Mundil, R., Renne, P.R., and Ludwig, K.R., 2000, A test for systematic errors in  $^{40}\text{Ar}/^{39}\text{Ar}$  geochronology through comparison with U/Pb analysis of a 1.1-Ga Rhyolite: *Geochimica et Cosmochimica Acta*, v. 64, p. 73–98, [https://doi.org/10.1016/S0016-7037\(99\)00204-5](https://doi.org/10.1016/S0016-7037(99)00204-5).
- Schmitz, M.D., and Schoene, B., 2007, Derivation of isotope ratios, errors and error correlations for U–Pb geochronology using  $^{205}\text{Pb}$ – $^{235}\text{U}$ –( $^{233}\text{U}$ )-spiked isotope dilution thermal ionization mass spectrometric data: *Geochemistry, Geophysics, Geosystems*, v. 8, <https://doi.org/10.1029/2006GC001492>.
- Trayler, R.B., Schmitz, M.D., Cuitiño, J.I., Kohn, M.J., Bargo, M.S., Kay, R.F., Strömberg, C.A.E., and Vizcaíno, S.F., 2020, An improved approach to age-modeling in deep time: Implications for the Santa Cruz Formation, Argentina: *Bulletin of the Geological Society of America*, v. 132, p. 233–244, <https://doi.org/10.1130/B35203.1>.
