# Supplementary material
Source: publisher figshare collection journal article supplement (https://gsapubs.figshare.com/articles/dataset/_/22310293)
Supplement: Supplementary file 1 [file 1]

## Sheet: Table S3.U-Pb Data in UC_Davis
Table S3. CA-TIMS U-Pb isotopic data in University of California, Davis
	Compositional Parameters					Radiogenic Isotope Ratios									Isotopic Ages
	Th	Pb*	Pbc	206Pb		208Pb	207Pb		207Pb		206Pb		corr.		207Pb		207Pb		206Pb
Sample	U	Pbc	(pg)	204Pb		206Pb	206Pb	% err	235U	% err	238U	% err	coef.		206Pb	±	235U	±	238U	±
(a)	(b)	(c)	(c)	(d)		(e)	(e)	(f)	(e)	(f)	(e)	(f)			(g)	(f)	(g)	(f)	(g)	(f)
QS18-14
CR-1	1.60667	1.77961	0.391027	104.101		0.495822	0.0466772	16.2	0.118708	17.3368	0.0184531	1.05621	0.892		31.6685	388.078	113.9	18.6794	117.872	1.23314
CR-2	1.64941	1.34095	0.528821	82.6073		0.506041	0.046426	17.6038	0.119713	18.7056	0.01871	1.07703	1.0217		18.7188	422.743	114.812	20.3066	119.498	1.27464
CR-5	1.83535	1.68254	0.45998	95.2465		0.578517	0.047779	21.7412	0.123793	22.5986	0.0187998	1.08303	0.80061		87.2761	515.4	118.505	25.2768	120.066	1.28769
CR-6	1.54663	0.62157	0.768457	48.9656		0.470808	0.0460135	37.9128	0.11753	39.509	0.0185334	1.88492	0.853569		-2.76029	914.103	112.83	42.1904	118.381	2.20977
CR-7	1.79391	0.282539	2.80687	32.0818		0.509298	0.0427719	134.02	0.109823	134.947	0.0186307	2.70253	0.351763		-181.993	3345.21	105.804	135.591	118.996	3.18471
CR-10	1.41826	0.924051	1.21489	64.7564		0.437245	0.0466494	25.7927	0.119974	26.3446	0.018661	1.00594	0.561968		30.238	618	115.048	28.655	119.188	1.18725
CR-14	2.07982	1.22055	1.15538	71.8225		0.651015	0.0474166	18.2285	0.122222	18.8423	0.0187032	0.920982	0.680048		69.1873	433.601	117.085	20.8371	119.455	1.08955
CR-4	1.38141	11.8172	0.706425	605.305		0.444354	0.0488086	1.93026	0.126417	2.06054	0.0187934	0.145361	0.903154		137.591	45.3312	120.873	2.34811	120.025	0.172757
CR-9	1.74467	2.38588	0.826751	129.95		0.540756	0.0469292	7.08204	0.12128	7.55842	0.0187517	0.451519	1.05169		44.5503	169.236	116.232	8.30111	119.762	0.535482
CR-11	2.00027	6.8395	1.44949	319.228		0.636978	0.0482955	1.9899	0.124933	2.11529	0.0187699	0.130714	0.961748		112.711	46.9507	119.534	2.38534	119.877	0.155179
CR-12	1.61844	7.22949	0.671579	356.942		0.533336	0.0500781	2.47659	0.12977	2.66288	0.0188027	0.193145	0.967021		197.572	57.5254	123.891	3.10574	120.085	0.229673
CR-13	1.53328	2.09461	2.73489	120.242		0.479932	0.0474132	5.10387	0.122376	5.39106	0.0187279	0.302435	0.952344		69.0192	121.403	117.223	5.96844	119.611	0.358214
CR-15	1.63181	4.89186	1.02889	252.27		0.504707	0.0468248	3.41083	0.121068	3.61972	0.0187606	0.226073	0.928551		39.2252	81.5878	116.04	3.96919	119.818	0.268232
																				Weighted mean 206Pb/238U age = 119.912 ± 0.090 (0.097) [0.161] Ma (2s); MSWD = 1.16 (n=12/13)
ZY18-14
SB16-12	2.14877	15.5081	0.855566	673.903		0.700477	0.0495154	0.961461	0.128391	1.03475	0.0188142	0.075604	0.971552		171.261	22.4415	122.65	1.19547	120.158	0.0899667
SB14-11	1.06236	56.9059	0.178794	3059.4		0.339548	0.0484911	0.457802	0.126275	0.494874	0.0188951	0.0468737	0.808616		122.238	10.7815	120.745	0.563375	120.669	0.056
SB14-12	1.17596	17.1033	3.47315	903.679		0.382534	0.0494179	1.56429	0.129274	1.69073	0.0189812	0.115564	1.08736		166.655	36.5398	123.446	1.96525	121.214	0.138686
SB14-13	1.96874	18.5487	0.342581	838.966		0.626689	0.0482799	1.75807	0.125119	1.89633	0.018804	0.127734	1.07668		111.945	41.4864	119.702	2.14125	120.093	0.151911
SB14-14	1.33802	2.32645	2.1872	136.302		0.41803	0.0473246	4.24565	0.122466	4.49451	0.0187769	0.250097	0.995345		64.5703	101.071	117.305	4.97915	119.921	0.29697
SB14-15	1.89329	11.4627	0.631485	532.658		0.60364	0.0483599	1.68683	0.125278	1.81223	0.0187967	0.118988	1.05028		115.851	39.7762	119.846	2.0486	120.047	0.141453
SB16-11	1.51958	5.56588	0.264138	287.395		0.486205	0.0485374	3.97369	0.125771	4.26054	0.0188018	0.285165	1.00553		124.487	93.548	120.291	4.8331	120.079	0.339067
SB16-13	2.12617	8.47663	0.766506	382.231		0.676347	0.0482459	2.0029	0.124973	2.15066	0.0187954	0.145545	1.01423		110.286	47.2792	119.571	2.42593	120.038	0.173021
SB16-14	1.56438	10.934	0.687436	541.887		0.499205	0.0483991	1.51116	0.12532	1.62427	0.0187879	0.111064	1.01709		117.76	35.6202	119.884	1.83668	119.991	0.131963
																				Weighted mean 206Pb/238U age = 120.034 ± 0.070 (0.079) [0.151] Ma (2s); MSWD = 0.34 (n=6/9)
ZY18-04
CR1-1	1.23551	16.3258	1.06518	857.122		0.395152	0.0485263	0.783245	0.12611	0.83442	0.0188567	0.0580237	0.889694		123.947	18.4411	120.596	0.948817	120.426	0.0691913
CR1-4	1.20265	48.103	0.639345	2508.79		0.384007	0.0484319	0.342667	0.125658	0.368104	0.0188258	0.0291097	0.883185		119.359	8.07444	120.188	0.417238	120.23	0.034653
CR1-6	1.65006	27.3216	0.616447	1304.81		0.525857	0.0483418	0.686266	0.125572	0.736809	0.0188479	0.0508749	0.993924		114.971	16.1848	120.111	0.83465	120.371	0.0606389
CR1-8	1.64469	5.73101	2.30051	288.658		0.524281	0.0483593	1.82119	0.125797	1.92005	0.0188749	0.121826	0.822277		115.822	42.9438	120.314	2.17847	120.541	0.145411
CR1-12	1.14819	7.00841	1.12041	387.56		0.361044	0.0476496	1.69962	0.123475	1.80675	0.0188023	0.118904	0.907157		80.8424	40.3371	118.217	2.01624	120.082	0.141372
CR1-2	2.46531	17.5931	0.935385	726.103		0.792346	0.0487937	0.979752	0.126657	1.04704	0.0188348	0.0857876	0.800159		136.876	23.0164	121.09	1.19518	120.288	0.102219
CR1-5	1.08575	40.5268	0.6101	2172.6		0.346972	0.0484738	0.423728	0.125782	0.455141	0.0188281	0.0356565	0.889772		121.401	9.98062	120.301	0.516347	120.245	0.0424506
CR1-7	1.28912	45.0383	0.545209	2305.04		0.412012	0.0484833	0.421605	0.125849	0.453684	0.0188345	0.0353841	0.91353		121.859	9.92997	120.361	0.514937	120.285	0.0421422
CR1-9	1.18111	8.46198	2.07231	458.88		0.376843	0.0483945	1.11905	0.125641	1.18084	0.0188378	0.074342	0.840913		117.539	26.3775	120.174	1.3383	120.307	0.0885541
CR1-11	1.16332	14.5867	0.635664	780.63		0.371141	0.0483902	1.13284	0.125622	1.21571	0.0188366	0.0831042	0.99736		117.328	26.7038	120.156	1.37763	120.299	0.0989847
CR1-13	1.34358	10.8754	1.07003	564.586		0.428378	0.0483578	1.14392	0.125444	1.21783	0.0188226	0.078768	0.942114		115.747	26.9733	119.996	1.3783	120.21	0.0937549
CR1-14	1.1894	17.2253	0.667197	912.786		0.380033	0.048468	0.922349	0.125838	0.989535	0.0188387	0.0679704	0.989248		121.115	21.7267	120.351	1.12304	120.312	0.0809683
CR1-15	1.2228	6.017	4.49177	330.093		0.38469	0.0476813	1.52576	0.123857	1.60209	0.0188481	0.098923	0.784155		82.4195	36.2004	118.563	1.79278	120.372	0.117898
																				Weighted mean 206Pb/238U age = 120.276 ± 0.024 (0.044) [0.136] Ma (2s); MSWD = 1.21 (n=8/13)
Notes:
(a) Model Th/U ratio calculated from radiogenic 208Pb/206Pb ratio and 207Pb/235U age; bold indicates results used in weighted mean calculations.
(b) Pb* and Pbc represent radiogenic and common Pb, respectively
(c) Measured ratio corrected for spike and fractionation only.
(d) Corrected for fractionation, spike, and common Pb; all common Pb was assumed to be blank with the isotopic composition of 206Pb/204Pb = 18.59 ± 0.65%; 207Pb/204Pb = 15.79 ± 0.70%; 208Pb/204Pb = 38.54 ± 0.65% (1σ).
(e) Errors are 2-sigma, propagated using the algorithms of Schmitz and Schoene (2007) and Crowley et al. (2007).
(f) Calculations are based on the decay constants of Jaffey et al. (1971) and a 238U/235U ratio of 137.818 (Hiess et al. 2012).
Rederences
Crowley, J.L., Schoene, B., and Bowring, S.A., 2007, U-Pb dating of zircon in the Bishop Tuff at the millennial scale: Geology, v. 35, p. 1123–1126, https://doi.org/10.1130/G24017A.1
Jaffey, A.H., Flynn, K.F., Glendenin, L.E., Bentley, W.T., and Essling, A.M., 1971, Precision measurement of half-lives and specific activities of 235U and 238U: Physical review C, v. 4, p.1889–1906, https://doi.org/10.1103/PhysRevC.4.1889
Hiess, J., Condon, D.J., McLean, N., and Noble, S.R., 2012, 238U/235U systematics in terrestrial uranium-bearing minerals: Science, v. 335, p. 1610–1614, https://doi.org/10.1126/science.1215507
Schmitz, M.D., and Schoene, B., 2007, Derivation of isotope ratios, errors and error correlations for U-Pb geochronology using 205Pb-235U-(233U)-spiked isotope dilution thermal ionization mass spectrometric data: Geochemistry, Geophysics, Geosystems, v. 8, https:// doi .org/10 .1029 /2006GC001492

## Sheet: Table S4.U-Pb Data in BSU
Table S4. CA-TIMS U-Pb isotopic data in Boise State University
	Compositional Parameters							Radiogenic Isotope Ratios									Isotopic Ages
	Th	206Pb*	mol %	Pb*	Pbc	206Pb		208Pb	207Pb		207Pb		206Pb		corr.		207Pb		207Pb		206Pb
Sample	U	x10-13 mol	206Pb*	Pbc	(pg)	204Pb		206Pb	206Pb	% err	235U	% err	238U	% err	coef.		206Pb	±	235U	±	238U	±
(a)	(b)	(c)	(c)	(c)	(c)	(d)		(e)	(e)	(f)	(e)	(f)	(e)	(f)			(g)	(f)	(g)	(f)	(g)	(f)
QS18-14
z18	1.61972	0.0502707	0.94804	7.11046	0.228669	347.229		0.517395	0.0475848	2.23851	0.12385	2.33975	0.0188853	0.183289	0.579817		77.6058	53.1569	118.557	2.61811	120.607	0.219005
z5	2.23589	0.142199	0.913402	4.64002	1.11791	208.914		0.714227	0.0495196	1.86479	0.128767	2.06771	0.0188678	0.558356	0.480487		171.455	43.5187	122.989	2.39507	120.496	0.66655
z9	1.72634	0.0230921	0.897378	3.48321	0.219165	175.813		0.551464	0.0479103	6.28471	0.124425	6.50611	0.018844	0.987714	0.296146		93.7778	148.791	119.076	7.31018	120.346	1.17764
z10	1.58102	0.140101	0.972674	13.7688	0.326653	660.269		0.505042	0.0483583	0.848408	0.12563	0.91183	0.0188501	0.117205	0.587584		115.775	20.004	120.163	1.03333	120.385	0.139788
z15	2.11115	0.0990835	0.832351	2.13812	1.65091	108.722		0.674388	0.0482897	3.15232	0.125416	3.35554	0.0188449	0.285396	0.732906		112.424	74.3725	119.97	3.79694	120.351	0.340291
z12	1.78806	0.0940759	0.967995	12.2036	0.258147	563.731		0.571181	0.0487831	1.00079	0.126614	1.07547	0.0188324	0.125859	0.632187		136.364	23.5071	121.05	1.22725	120.273	0.14997
z6	1.72599	0.056723	0.952464	7.98662	0.234951	379.549		0.551356	0.0490914	3.34187	0.127341	3.52975	0.0188216	0.268133	0.719943		151.145	78.2815	121.705	4.04843	120.204	0.31932
z17	1.61999	0.0636141	0.956969	8.6723	0.237403	419.28		0.517496	0.0484835	1.86687	0.125757	1.98214	0.0188205	0.140656	0.832136		121.869	43.9678	120.278	2.24828	120.197	0.167498
																						Weighted mean 206Pb/238U age = 120.296 ± 0.080 (0.088) [0.156] Ma (2s); MSWD = 0.65 (n=7/8)
ZY18-04
z6	1.49021	0.136664	0.937552	5.69944	0.755478	288.915		0.476009	0.0487242	1.52282	0.127535	1.63023	0.0189924	0.152123	0.730109		133.525	35.7877	121.881	1.87232	121.285	0.182777
z7	1.06342	0.75332	0.990666	36.6597	0.589078	1932.92		0.339691	0.0485095	0.264073	0.126433	0.2873	0.0189117	0.049888	0.539249		123.132	6.2179	120.888	0.327433	120.774	0.0596909
z8	1.17588	0.384838	0.993486	54.0531	0.209408	2769.85		0.375615	0.0484454	0.217423	0.126172	0.245521	0.0188976	0.0789877	0.497232		120.013	5.12244	120.652	0.279305	120.685	0.0944394
z2	1.22207	0.836616	0.996462	100.875	0.246498	5100.2		0.390371	0.0485233	0.182938	0.126293	0.197714	0.0188853	0.0507997	0.410775		123.801	4.30696	120.762	0.225111	120.607	0.0606986
z3	1.21826	0.418924	0.993816	57.4961	0.216359	2917.35		0.389159	0.0484526	0.190642	0.126029	0.211799	0.0188733	0.0534064	0.505865		120.364	4.49117	120.523	0.240698	120.531	0.0637733
z5	1.60588	0.240796	0.93036	5.20585	1.49182	261.297		0.512978	0.047542	1.46946	0.123671	1.5637	0.018875	0.146404	0.671752		75.4708	34.9087	118.395	1.74748	120.542	0.174838
z7	1.18042	0.20456	0.981731	19.0645	0.315921	987.606		0.377069	0.0484496	0.629525	0.126031	0.677728	0.0188748	0.113463	0.49422		120.221	14.8309	120.525	0.770215	120.54	0.135498
z6	1.05485	0.205719	0.985877	24.0613	0.24459	1277.46		0.33696	0.048395	0.495398	0.125846	0.551652	0.0188682	0.162639	0.475803		117.564	11.6767	120.358	0.626115	120.499	0.194159
z5	1.35337	0.622701	0.989319	34.1445	0.55797	1689.14		0.432323	0.0485862	0.274378	0.126168	0.298529	0.0188422	0.0527685	0.532483		126.851	6.45608	120.649	0.339597	120.334	0.0629097
z4	1.1869	0.618439	0.994646	66.0024	0.276298	3369.66		0.379144	0.048517	0.14961	0.12598	0.167286	0.0188409	0.0441338	0.51639		123.497	3.5225	120.479	0.190047	120.326	0.0526119
z1	1.08388	0.930453	0.993816	55.7755	0.480479	2917.75		0.346235	0.0484634	0.164412	0.125823	0.182061	0.0188382	0.0433441	0.512266		120.89	3.87286	120.337	0.206603	120.309	0.0516634
z1	1.58977	0.51528	0.995087	78.4909	0.211162	3671.99		0.50784	0.0485819	0.196121	0.12608	0.21525	0.0188306	0.0541647	0.466105		126.64	4.61489	120.569	0.244708	120.261	0.0645354
z4	1.24015	0.580982	0.991833	43.6587	0.397035	2209.18		0.396157	0.0482394	0.254889	0.125168	0.276959	0.0188273	0.0488945	0.527392		109.964	6.01633	119.747	0.31284	120.24	0.0582459
																						Weighted mean 206Pb/238U age = 120.296 ± 0.026 (0.045) [0.137] Ma (2s); MSWD = 1.97 (n=5/13)
Notes:
(a) z1, z2 etc. are labels for single zircon grains or fragments annealed and chemically abraded after Mattinson (2005); bold indicates results used in weighted mean calculations.
(b) Model Th/U ratio iteratively calculated from the radiogenic 208Pb/206Pb ratio and 206Pb/238U age.
(c) Pb* and Pbc represent radiogenic and common Pb, respectively; mol % 206Pb* with respect to radiogenic, blank and initial common Pb.
(d) Measured ratio corrected for spike and fractionation only. Fractionation calculated from the measured ET2535 double spike Pb and U ratios.
(e) Corrected for fractionation, spike, and common Pb. Up to 1 pg common Pb was assumed to be procedural blank: 206Pb/204Pb = 18.042 ± 0.61%; 207Pb/204Pb = 15.537 ± 0.52%;
208Pb/204Pb = 37.686 ± 0.63% (all uncertainties 1-sigma); the remainder was assigned a composition estimated from the Stacey & Kramers (1975) two-stage evolution model at 120 Ma.
(f) Errors are 2-sigma, propagated using the algorithms of Schmitz and Schoene (2007).
(g) Calculations are based on the decay constants of Jaffey et al. (1971). 206Pb/238U and 207Pb/206Pb ages corrected for initial disequilibrium in 230Th/238U using D(Th/U) = 0.2.
(h) Age uncertainties reported at the 95% confidence interval, as ± analytical (+tracer) [+decay constant]; MSWD = mean squared weighted deviation. *The 95% confidence interval is computed
as the internal standard deviation multiplied by the Student's t-distribution multiplier for a two-tailed 95% critical interval and n-1 degrees of freedom for MSWD < 1+2*sqrt[2/(n-1)] (Wendt
and Carl, 1991), or expanded via multiplication by the sqrt(MSWD) when the MSWD ≥ 1+2*sqrt[2/(n-1)], in order to accommodate unknown sources of overdispersion.
Rederences
Jaffey, A.H., Flynn, K.F., Glendenin, L.E., Bentley, W.T., and Essling, A.M., 1971, Precision measurement of half-lives and specific activities of 235U and 238U: Physical review C, v. 4, p.1889–1906, https://doi.org/10.1103/PhysRevC.4.1889
Mattinson J.M., 2005, Zircon U–Pb chemical abrasion (“CA-TIMS”) method: Combined annealing and multi-step partial dissolution analysis for improved precision and accuracy of zircon ages: Chemical Geology, v. 220, p. 47–66, https://doi.org/10.1016/j.chemgeo.2005.03.011
Stacey, J.S, and Kramers, J.D., 1975, Approximation of terrestrial lead isotope evolution by a two-stage model: Earth and planetary science letters, v. 26, p. 207–221, https://doi.org/10.1016/0012-821X(75)90088-6
Schmitz, M.D., and Schoene, B., 2007, Derivation of isotope ratios, errors and error correlations for U-Pb geochronology using 205Pb-235U-(233U)-spiked isotope dilution thermal ionization mass spectrometric data: Geochemistry, Geophysics, Geosystems, v. 8, https:// doi .org/10 .1029 /2006GC001492
Wendt I, and Carl C, 1991, The statistical distribution of the mean squared weighted deviation: Chemical Geology, Isotope Geoscience Section, v. 86, p. 275–285, https://doi.org/10.1016/0168-9622(91)90010-T

## Sheet: Table S5.Ar Data
Table S5. Complete 40Ar/39Ar data in WiscAr lab, University of Wisconsin-Madison
	Sample:	QS18-14
	Material:	Sanidine			Location:	36°06'25.31"N, 119°54'27.43"E
														Corrected1
	N	Power	Age	±1σ	K/Ca	±1σ	%40Ar	40Ar*/39ArK	±1σ	39Ar/40Ar	±1σ	36Ar/40Ar	±1σ	40Ar	±1σ	39Ar	±1σ	38Ar	±1σ	37Ar	±1σ	36Ar	±1σ	J	±1σ	39Ar Decay	37Ar Decay	Ca/K
		%	(Ma)	(Ma)			(%)							(cps)		(cps)		(cps)		(cps)		(cps)
	01A	20	119.68	0.0980146	10.9578	0.667162	99.0524	3.05431	0.00258408	0.324873	0.000198682	2.5919e-05	1.92891e-06	384922	207.485	124665	35.2792	1492.34	16.6171	108.291	6.59299	11.2793	0.736673	0.0221256	3.70805e-06	1.00137	45.344	2.32
	02A	20	119.9	0.148004	7.89272	0.618656	98.8564	3.06012	0.00390249	0.323612	0.000207231	3.25183e-05	3.64777e-06	213599	116.688	68911	22.6613	825.384	11.0413	83.0898	6.51253	7.94826	0.773627	0.0221256	3.70805e-06	1.00137	45.3527	2.32
X	03A	20	120.377	0.157126	8.90624	0.829873	99.3163	3.07268	0.00414408	0.323788	0.000248498	1.70827e-05	3.68843e-06	203886	124.216	65812.7	30.4241	749.777	11.9903	70.2867	6.54893	4.32222	0.746336	0.0221256	3.70805e-06	1.00137	45.3768	2.32
	05A	20	119.57	0.107179	14.4036	1.29923	97.9277	3.05142	0.00282552	0.321483	0.000194003	6.3716e-05	2.27941e-06	344563	184.508	110430	30.0681	1319.89	14.3631	72.8727	6.57306	22.8027	0.779725	0.0221256	3.70805e-06	1.00137	45.4097	2.32
X	06A	20	120.252	0.125671	8.97749	0.747194	98.7617	3.06941	0.00331426	0.322321	0.000202675	3.57172e-05	2.89543e-06	243574	130.268	78268	25.4747	926.323	11.0426	82.8493	6.89523	9.69335	0.698849	0.0221256	3.70805e-06	1.00137	45.4185	2.32
	07A	20	119.629	0.115107	12.6944	1.06871	97.79	3.05296	0.00303463	0.320867	0.000201404	6.83462e-05	2.50043e-06	318835	173.157	101989	31.5442	1199.45	9.41014	76.3089	6.42407	22.6767	0.791779	0.0221256	3.70805e-06	1.00137	45.4426	2.32
	08A	20	119.926	0.13796	13.8432	1.86924	98.9522	3.0608	0.00363769	0.323855	0.000204427	2.92986e-05	3.33347e-06	216447	116.16	69880.9	22.8579	841.959	8.68732	47.9373	6.47278	6.91722	0.7158	0.0221256	3.70805e-06	1.00137	45.4514	2.32
	09A	20	119.768	0.121628	11.955	1.13067	99.3442	3.05663	0.00320677	0.325584	0.00020022	1.61141e-05	2.82678e-06	268074	142.874	87010.2	26.2061	1038.49	12.4678	69.0781	6.53303	5.15534	0.752118	0.0221256	3.70805e-06	1.00137	45.4754	2.32
	10A	20	119.875	0.11941	10.3156	0.903284	99.2593	3.05946	0.00314847	0.325004	0.00020587	1.89749e-05	2.69294e-06	261228	141.162	84637.8	27.5243	993.26	11.1885	77.8581	6.81741	5.89368	0.697161	0.0221256	3.70805e-06	1.00137	45.4843	2.32
	11A	20	119.624	0.097108	10.2888	0.651873	99.2008	3.05284	0.0025601	0.325517	0.000194167	2.0928e-05	1.95096e-06	365784	192.481	118701	32.6309	1424.84	14.951	109.419	6.93228	8.98208	0.707179	0.0221256	3.70805e-06	1.00137	45.5084	2.32
	12A	20	119.608	0.0897444	12.1922	0.663637	98.8851	3.05242	0.00236595	0.324525	0.000188342	3.1538e-05	1.68662e-06	472965	247.676	153014	37.2791	1830.97	19.2066	119.007	6.47749	16.3451	0.792201	0.0221256	3.70805e-06	1.00137	45.5172	2.32
	14A	20	119.771	0.130182	11.7255	1.06636	96.2952	3.05671	0.00343232	0.315566	0.000193816	0.000118592	2.99692e-06	296081	158.454	93148.8	27.5658	1122.05	12.7036	75.275	6.84554	35.9751	0.881537	0.0221256	3.70805e-06	1.00137	45.5502	2.32
	15A	20	119.76	0.113334	10.1696	0.738659	98.9575	3.05643	0.00298809	0.324335	0.000200243	2.91121e-05	2.5043e-06	315761	171.317	102097	29.488	1200.87	14.1437	95.0781	6.90565	10.3343	0.784703	0.0221256	3.70805e-06	1.00137	45.5744	2.32
	16A	20	119.659	0.0934462	12.4437	0.84535	99.5039	3.05376	0.00246361	0.326415	0.000193353	1.07405e-05	1.82211e-06	400048	212.648	130177	33.1907	1550.86	14.7105	99.0543	6.72892	5.49987	0.72284	0.0221256	3.70805e-06	1.00137	45.5832	2.32
X	17A	20	120.187	0.138496	10.7194	0.792976	98.524	3.06768	0.00365235	0.321725	0.000297085	4.37049e-05	2.43779e-06	324510	284.146	104082	29.6218	1216.56	13.2115	91.8898	6.79741	15.2744	0.785095	0.0221256	3.70805e-06	1.00137	45.6074	2.32
	18A	20	119.808	0.128345	7.45797	0.298344	97.7855	3.05769	0.00338396	0.320355	0.000290279	6.85064e-05	1.99909e-06	444055	386.078	141821	34.8204	1696.87	15.4472	179.924	7.19715	32.5764	0.881244	0.0221256	3.70805e-06	1.00137	45.6162	2.32
	19A	20	119.734	0.124678	8.64472	0.412318	98.9016	3.05573	0.00328712	0.324226	0.000295421	3.09911e-05	1.85455e-06	414796	361.671	134073	34.1795	1599.89	16.1941	146.667	6.99509	14.632	0.762896	0.0221256	3.70805e-06	1.00137	45.6404	2.32
	20A	20	119.897	0.166505	8.81228	0.798731	98.5366	3.06005	0.00439029	0.322571	0.000306062	4.32661e-05	3.52483e-06	221282	195.046	71159.7	24.4603	834.699	12.7697	76.3492	6.91988	10.4891	0.773822	0.0221256	3.70805e-06	1.00137	45.6493	2.32
	21A	20	119.736	0.100277	7.45604	0.361803	98.8445	3.05579	0.0026438	0.324032	0.000193834	3.29108e-05	2.05722e-06	344413	179.653	111258	31.9443	1326.33	14.0908	141.01	6.84206	13.0472	0.702145	0.0221256	3.70805e-06	1.00137	45.6735	2.32
	22A	20	119.927	0.130976	12.9118	1.43951	98.9529	3.06084	0.00345355	0.323852	0.000203362	2.92751e-05	3.10217e-06	239846	127.638	77434.8	25.4099	921.177	13.6808	56.6629	6.31704	7.70243	0.73857	0.0221256	3.70805e-06	1.00137	45.6823	2.32
	23A	20	119.87	0.106213	9.95039	0.702127	99.1054	3.05931	0.00280052	0.324514	0.000200502	2.4148e-05	2.23456e-06	266567	142.151	86237.9	26.4357	1010.19	11.6547	81.8415	5.77473	7.42432	0.590263	0.0221256	3.70805e-06	1.00137	45.7066	2.32
	24A	20	119.824	0.1098	14.6881	1.47592	99.351	3.05812	0.00289502	0.325447	0.00019351	1.58883e-05	2.44866e-06	298768	156.778	96931.6	26.5222	1148.41	12.1751	62.3069	6.26069	5.49905	0.726128	0.0221256	3.70805e-06	1.00137	45.7154	2.32
	25A	20	119.752	0.138671	10.9712	1.16255	99.0005	3.05623	0.00365609	0.324498	0.000220253	2.76653e-05	3.26223e-06	218163	119.361	70574.8	28.0242	836.225	11.0145	60.6991	6.43168	6.76837	0.705927	0.0221256	3.70805e-06	1.00137	45.7413	2.32
	26A	20	119.621	0.106307	9.77783	0.595366	99.2626	3.05276	0.00280262	0.325729	0.000201848	1.885e-05	2.2471e-06	341778	181.833	110983	34.6595	1320.45	15.2825	107.081	6.51982	7.74624	0.762335	0.0221256	3.70805e-06	1.00137	45.7503	2.32
	27A	20	119.601	0.0903945	11.4482	0.712098	99.2249	3.05223	0.00238308	0.325662	0.000183319	2.01175e-05	1.79095e-06	413865	206.819	134362	33.9789	1580.23	16.0499	110.665	6.88332	9.66326	0.734914	0.0221256	3.70805e-06	1.00137	45.7746	2.32
	28A	20	119.711	0.0899155	11.9648	0.718012	98.9134	3.05513	0.00237059	0.324329	0.000182245	3.0592e-05	1.76042e-06	448906	224.159	145143	36.4997	1718.48	16.5178	114.361	6.86262	15.1091	0.784195	0.0221256	3.70805e-06	1.00137	45.7835	2.32
	29A	20	119.847	0.125333	14.5411	1.85265	98.7111	3.05872	0.0033046	0.323284	0.000193954	3.73992e-05	2.9636e-06	245259	124.374	79043.2	24.9296	924.631	10.5105	51.2186	6.52552	9.77861	0.721003	0.0221256	3.70805e-06	1.00137	45.8078	2.32
	30A	20	119.84	0.134277	7.00458	0.4791	99.216	3.05854	0.00354042	0.32496	0.000203123	2.04269e-05	3.23632e-06	219087	113.248	70975.3	24.5936	839.623	11.9967	95.4533	6.52846	5.64188	0.703099	0.0221256	3.70805e-06	1.00137	45.8166	2.32
	31A	20	119.821	0.112258	11.376	1.0177	98.8499	3.05804	0.00295981	0.323811	0.000192596	3.27318e-05	2.51945e-06	294339	152.963	95015.8	26.9415	1124	15.5243	78.6407	7.03497	10.5816	0.735047	0.0221256	3.70805e-06	1.00137	45.8412	2.32
	32A	20	119.58	0.111359	7.83845	0.49638	99.0629	3.05167	0.00293573	0.325189	0.000198688	2.55609e-05	2.45892e-06	288622	151.408	93567.3	28.7989	1113.52	11.7824	112.369	7.11553	8.74925	0.702878	0.0221256	3.70805e-06	1.00137	45.8501	2.32
	33A	20	119.636	0.184864	11.781	0.785361	97.7299	3.05733	0.00488034	0.32021	0.000247264	7.03751e-05	4.56217e-06	249672	147.594	79713.2	39.2743	962.696	3.69952	94.0104	6.26672	18.3274	1.13575	0.0220955	6.16852e-06	1.00123	31.0605	2.32
	34A	20	119.829	0.176411	10.4967	0.590863	99.136	3.06241	0.00465765	0.324285	0.000252181	2.31243e-05	4.34049e-06	243327	148.564	78674.7	37.5487	938.637	4.19071	104.118	5.86044	6.48612	1.0531	0.0220955	6.16852e-06	1.00123	31.0665	2.32
	35A	20	119.888	0.15576	13.2406	0.801343	99.6094	3.06398	0.00411256	0.32567	0.000240127	7.21498e-06	3.74589e-06	298091	172.842	96791.7	43.6599	1158.09	4.52364	101.495	6.14235	2.99476	1.11339	0.0220955	6.16852e-06	1.00123	31.0829	2.32
	36A	20	119.642	0.14693	9.35363	0.364941	99.0156	3.05749	0.00387891	0.324414	0.0002453	2.71612e-05	3.37516e-06	303019	171.237	98013.9	48.8422	1177.5	4.26387	145.458	5.67453	9.43431	1.01976	0.0220955	6.16852e-06	1.00123	31.0888	2.32
	37A	20	119.756	0.171377	16.1684	1.45674	98.9435	3.0605	0.00452458	0.323857	0.000237891	2.95907e-05	4.25115e-06	236756	134.324	76448.4	35.3435	911.217	3.93751	65.6003	5.91024	7.53989	1.00343	0.0220955	6.16852e-06	1.00123	31.1053	2.32
	38A	20	119.92	0.161409	11.4267	0.734262	99.2193	3.06481	0.00426179	0.324304	0.000250802	2.03291e-05	3.84042e-06	264630	156.813	85567.1	42.161	1027.5	4.0234	103.873	6.67434	6.24034	1.0129	0.0220955	6.16852e-06	1.00123	31.1112	2.32
	39A	20	119.687	0.173814	13.1537	1.06089	99.1326	3.05866	0.00458874	0.324673	0.000250843	2.32304e-05	4.27007e-06	213969	130.71	69264.4	32.4566	828.432	4.01075	73.0054	5.88794	5.57233	0.910658	0.0220955	6.16852e-06	1.00123	31.1277	2.32
	40A	20	119.65	0.184932	10.4268	0.700887	99.4335	3.05768	0.00488217	0.325765	0.000272373	1.31155e-05	4.53381e-06	208740	130.835	67799	37.2379	813.662	4.00241	90.1313	6.0582	3.4886	0.943292	0.0220955	6.16852e-06	1.00123	31.1336	2.32
	41A	20	119.818	0.150353	12.4733	0.69237	99.5911	3.06213	0.00396964	0.325807	0.000247628	7.82541e-06	3.50616e-06	304445	180.726	98896.3	46.5094	1186.2	4.37055	109.844	6.0969	3.29894	1.06425	0.0220955	6.16852e-06	1.00123	31.1501	2.32
	43A	20	119.982	0.231651	8.53515	0.374265	91.7249	3.06647	0.00611665	0.299606	0.000265513	0.000272196	5.40105e-06	287981	220.076	86038.2	38.1923	1046.14	4.63572	139.553	6.11886	79.4326	1.55078	0.0220955	6.16852e-06	1.00124	31.1726	2.32
	44A	20	119.707	0.137848	12.3345	0.642613	99.5138	3.05919	0.00363927	0.325868	0.000230778	1.04186e-05	3.18753e-06	315742	180.43	102585	42.4389	1228.78	3.95686	115.118	5.99717	4.24908	1.00333	0.0220955	6.16852e-06	1.00124	31.1785	2.32
	45A	20	119.705	0.180775	11.7289	0.835922	98.9592	3.05915	0.00477256	0.324052	0.000262569	2.90599e-05	4.41738e-06	226977	141.593	73335.2	37.6106	872.482	4.04545	86.498	6.1644	7.30818	0.999474	0.0220955	6.16852e-06	1.00124	31.195	2.32
	46A	20	120.02	0.182777	9.77045	0.60263	99.0835	3.06747	0.00482624	0.323578	0.000247491	2.49001e-05	4.56384e-06	221444	132.496	71443.3	33.7303	854.093	3.60629	101.138	6.23769	6.35316	1.00743	0.0220955	6.16852e-06	1.00124	31.201	2.32
	47A	20	119.576	0.196892	14.6178	1.39188	99.2767	3.05573	0.00519769	0.325458	0.000258889	1.83839e-05	5.00293e-06	201086	124.145	65250.8	32.4494	788.074	3.51997	61.7085	5.87555	4.2098	1.00297	0.0220955	6.16852e-06	1.00124	31.2174	2.32
	48A	20	119.575	0.143858	9.59222	0.324468	99.1731	3.0557	0.00379765	0.32512	0.000313425	2.18658e-05	2.58724e-06	407351	362.133	132047	48.2844	1583.58	5.17019	190.268	6.43544	10.4912	1.05057	0.0220955	6.16852e-06	1.00124	31.2234	2.32
	49A	20	119.783	0.147371	10.2225	0.472643	99.5609	3.0612	0.00389086	0.325808	0.00024544	8.84053e-06	3.41604e-06	305781	188.304	99330.9	42.6313	1194.47	4.69161	134.231	6.20576	3.82865	1.04134	0.0220955	6.16852e-06	1.00124	31.2399	2.32
	50A	20	119.682	0.146862	13.3763	0.78541	99.3276	3.05855	0.0038772	0.325324	0.00023929	1.6678e-05	3.43431e-06	315102	192.618	102207	41.312	1209.82	4.58008	105.533	6.19624	6.12797	1.07892	0.0220955	6.16852e-06	1.00124	31.2459	2.32
	51A	20	119.64	0.167644	10.3501	0.43269	98.3874	3.05743	0.00442574	0.322358	0.000313787	4.82752e-05	3.49983e-06	335022	298.565	107680	41.4249	1290.81	4.69328	143.616	6.00349	17.3531	1.16923	0.0220955	6.16852e-06	1.00124	31.2625	2.32
	52A	20	119.545	0.134832	14.647	0.81827	99.1581	3.05492	0.00355933	0.325155	0.000242657	2.2366e-05	2.96666e-06	357380	220.962	115859	47.8591	1385.39	5.3255	109.173	6.09879	8.89542	1.05704	0.0220955	6.16852e-06	1.00124	31.2685	2.32
	53A	20	119.69	0.184921	11.9554	0.805639	98.8213	3.05874	0.00488198	0.323643	0.000256176	3.36941e-05	4.58609e-06	249488	149.097	80506.6	41.4546	964.968	4.13793	92.8901	6.25927	9.17313	1.14087	0.0220955	6.16852e-06	1.00124	31.2851	2.32
	54A	20	119.94	0.179041	9.14936	0.535102	99.1548	3.06534	0.00472738	0.324037	0.000260601	2.24973e-05	4.37075e-06	218038	133.518	70444.3	36.4325	843.106	3.78602	106.186	6.20988	5.79102	0.949815	0.0220955	6.16852e-06	1.00124	31.2911	2.32
	55A	20	119.541	0.15604	12.2231	0.429636	99.3706	3.0548	0.00411917	0.325866	0.000372315	1.52228e-05	2.36667e-06	467958	454.317	152039	90.7383	1811.37	5.54551	171.46	6.02572	8.55172	1.10429	0.0220955	6.16852e-06	1.00124	31.3077	2.32
	56A	20	119.542	0.123394	10.518	0.369677	99.2666	3.05485	0.00325737	0.325518	0.000229539	1.87201e-05	2.65543e-06	405476	237.654	131599	50.9485	1570.39	5.50231	172.433	6.05996	9.02834	1.07352	0.0220955	6.16852e-06	1.00124	31.3137	2.32
	57A	20	119.62	0.192922	8.12495	0.394284	99.4527	3.05691	0.00509302	0.32591	0.000262306	1.24703e-05	4.86398e-06	210612	130.974	68437.8	34.6723	813.372	3.46416	116.023	5.6298	3.59895	1.02144	0.0220955	6.16852e-06	1.00124	31.3302	2.32
	58A	20	119.656	0.174241	9.76669	0.496678	98.8191	3.05785	0.00459993	0.32373	0.000245518	3.3767e-05	4.29767e-06	253399	149.941	81791.3	38.4482	980.433	4.44586	115.332	5.86467	9.51439	1.08592	0.0220955	6.16852e-06	1.00124	31.3363	2.32
Weighted mean Age ±2σ			119.723	0.076	n=52/55	MSWD=0.84
	Sample:	QS18-06
	Material:	Sanidine			Location:	36°05'42.42"N, 119°54'12.87"E
														Corrected1
	N	Power	Age	±1σ	K/Ca	±1σ	%40Ar*	40Ar*/39ArK	±1σ	39Ar/40Ar	±1σ	36Ar/40Ar	±1σ	40Ar	±1σ	39Ar	±1σ	38Ar	±1σ	37Ar	±1σ	36Ar	±1σ	J	±1σ	39Ar Decay	37Ar Decay	Ca/K
		%	(Ma)	(Ma)			(%)							(cps)		(cps)		(cps)		(cps)		(cps)
X	01A	25	120.452	0.165015	10.4018	1.45946	97.2718	5.2205	0.0073898	0.186352	0.000148769	9.09356e-05	3.7673e-06	174190	123.505	32407	11.8686	387.875	7.57014	17.8872	2.49613	16.1978	0.654004	0.0130312	9.41522e-07	1.00155	75.596	2.32
X	02A	25	120.377	0.119071	16.1564	2.00237	99.3194	5.21715	0.00533212	0.190398	0.000152278	2.23344e-05	2.09669e-06	289354	215.04	55000.5	16.2119	649.396	9.66092	19.589	2.40751	6.8509	0.604529	0.0130312	9.41522e-07	1.00155	75.6516	2.32
	03A	25	120.137	0.185604	56.9285	40.65	99.1628	5.2064	0.0083104	0.19049	0.000222069	2.75809e-05	3.58968e-06	168948	186.45	32128.7	12.0399	394.653	8.81903	3.31481	2.29891	4.72596	0.604485	0.0130312	9.41522e-07	1.00155	75.6746	2.32
	04A	25	119.905	0.127194	717.535	1624.52	98.4719	5.19598	0.00569441	0.189542	0.00019158	5.07268e-05	1.2737e-06	546882	540.148	103482	22.0782	1264.92	13.8842	1.12869	1.86118	27.7547	0.694818	0.0130312	9.41522e-07	1.00155	75.7302	2.32
	05A	25	119.878	0.105566	57.9628	16.1416	99.1239	5.19477	0.00472605	0.190841	0.000151571	2.88825e-05	1.4346e-06	454522	344.851	86595.7	20.2492	1031.89	16.6523	8.77035	2.37088	13.2911	0.650007	0.0130312	9.41522e-07	1.00155	75.7532	2.32
	06A	25	119.969	0.140778	18.5565	2.3681	98.8983	5.19887	0.00630273	0.190257	0.000194198	3.64393e-05	2.11081e-06	399370	395.482	75855.9	18.6806	927.794	14.2941	23.5129	2.97186	15.0283	0.840478	0.0130312	9.41522e-07	1.00155	75.7764	2.32
	07A	25	119.918	0.166172	52.6355	31.5874	99.3421	5.19659	0.00743946	0.191194	0.000159746	2.1573e-05	3.85677e-06	185605	142.312	35426.9	11.733	428.941	11.6984	3.93644	2.29939	4.08091	0.714112	0.0130312	9.41522e-07	1.00155	75.8322	2.32
X	08A	25	120.394	0.111596	14.7148	1.36321	99.4535	5.21787	0.00499742	0.190628	0.000154355	1.78414e-05	1.68307e-06	294331	223.773	56014.4	15.5579	653.911	11.4064	21.8295	2.00691	5.68389	0.493529	0.0130312	9.41522e-07	1.00155	75.8552	2.32
	09A	25	120.084	0.142952	10.4181	0.731402	99.4177	5.20401	0.00640047	0.191067	0.000196012	1.90379e-05	2.23106e-06	327910	324.588	62548.9	16.7826	736.796	16.0871	34.3423	2.39788	6.93264	0.729726	0.0130312	9.41522e-07	1.00155	75.8782	2.32
	10A	25	119.895	0.108063	17.1562	1.4312	99.5631	5.19554	0.00483787	0.191659	0.00014349	1.41672e-05	1.83348e-06	372226	261.204	71221.1	18.5208	841.345	11.7605	23.8113	1.96873	5.74709	0.681105	0.0130312	9.41522e-07	1.00155	75.934	2.32
X	11A	25	120.355	0.0936587	15.2952	0.97008	99.5576	5.21615	0.00419406	0.190891	0.000140814	1.43528e-05	1.04405e-06	493532	345.83	94053.4	21.5887	1096.79	12.7113	35.2262	2.21641	7.78157	0.513102	0.0130312	9.41522e-07	1.00155	75.9571	2.32
	12A	25	120.047	0.174061	17.8496	4.08494	98.5695	5.20234	0.00779319	0.189498	0.000152724	4.7456e-05	4.14909e-06	174382	124.311	32989.7	12.3821	383.23	9.79104	10.5983	2.4031	8.48253	0.721656	0.0130312	9.41522e-07	1.00155	75.9802	2.32
	13A	25	119.925	0.119857	14.4785	1.74852	98.8639	5.19689	0.00536599	0.190263	0.000144367	3.75913e-05	2.29155e-06	273215	191.488	51896.1	15.0466	629.083	8.98234	20.5033	2.45755	10.6856	0.623865	0.0130312	9.41522e-07	1.00155	76.0361	2.32
X	14A	25	120.381	0.177164	24.2335	5.71186	96.0672	5.2173	0.00793359	0.184157	0.000181792	0.000131293	3.6177e-06	249600	234.159	45888.8	14.0573	554.588	11.7947	10.8831	2.53322	32.9835	0.900758	0.0130312	9.41522e-07	1.00155	76.0592	2.32
	16A	25	120.115	0.0976004	15.1266	0.844059	99.4597	5.2054	0.00437	0.191097	0.000140416	1.76307e-05	1.33086e-06	536770	376.022	102404	22.6056	1224.31	16.4194	38.6855	2.14163	10.2432	0.712796	0.0130312	9.41522e-07	1.00155	76.1386	2.32
X	18A	25	120.642	0.152888	29.4843	8.65896	99.4799	5.22899	0.00684745	0.190273	0.000150866	1.69568e-05	3.4639e-06	203890	146.003	38729.8	13.1577	467.766	9.49887	7.55736	2.18591	3.60852	0.70466	0.0130312	9.41522e-07	1.00155	76.1849	2.32
	19A	25	120.282	0.120325	24.5443	5.539	99.7	5.21288	0.00538798	0.191284	0.000148249	9.58091e-06	2.27604e-06	211651	148.621	40417.6	13.2269	489.056	8.83785	9.44318	2.10419	2.21843	0.479658	0.0130312	9.41522e-07	1.00155	76.2408	2.32
	20A	25	120.155	0.173268	18.7016	3.05381	99.6037	5.20718	0.00775816	0.191308	0.00020233	1.28083e-05	3.48879e-06	176072	174.389	33627.7	12.4448	395.118	5.98174	10.2773	1.662	2.4592	0.613186	0.0130312	9.41522e-07	1.00155	76.264	2.32
	21A	25	120.04	0.179823	71.2921	69.3027	98.9651	5.20206	0.00805116	0.190269	0.000152305	3.42024e-05	4.37738e-06	161890	113.733	30750.6	11.7784	367.987	6.51533	2.5313	2.37274	5.58386	0.7068	0.0130312	9.41522e-07	1.00155	76.2872	2.32
	23A	25	119.932	0.165813	20.2852	4.45375	99.0284	5.19721	0.00742345	0.190568	0.000151292	3.2081e-05	3.92457e-06	178979	126.408	34050.5	12.3227	394.913	9.9273	9.58905	2.08333	5.92918	0.700931	0.0130312	9.41522e-07	1.00155	76.3665	2.32
	25A	25	120.234	0.184855	24.3035	8.6386	98.7931	5.21072	0.00827733	0.189622	0.000153253	3.99675e-05	4.50953e-06	169603	121.281	32106.5	12.0709	384.661	7.44623	7.55442	2.65165	6.92904	0.762686	0.0130312	9.41522e-07	1.00155	76.446	2.32
X	26A	25	120.404	0.115698	20.6121	2.94885	99.4917	5.21833	0.00518112	0.190685	0.000147302	1.65627e-05	2.06484e-06	239194	168.601	45534.2	14.3581	539.778	11.8533	12.6047	1.78411	4.21322	0.492388	0.0130312	9.41522e-07	1.00155	76.4696	2.32
X	27A	25	120.907	0.174635	128.535	217.099	99.2995	5.24086	0.00782256	0.189498	0.000152026	2.30022e-05	4.17645e-06	173306	123.823	32785.7	11.9409	394.869	10.4387	1.53571	2.43143	4.01381	0.721889	0.0130312	9.41522e-07	1.00155	76.4929	2.32
X	28A	25	120.495	0.113971	44.8528	13.335	99.1624	5.22243	0.00510403	0.189904	0.000145901	2.75933e-05	1.98308e-06	253835	178.368	48123.2	14.9127	565.653	7.68815	6.19177	1.79887	7.12039	0.501861	0.0130312	9.41522e-07	1.00155	76.5491	2.32
X	30A	25	120.403	0.164272	-67.0091	43.6509	99.115	5.21829	0.00735635	0.189964	0.000152329	2.91819e-05	3.836e-06	170759	121.831	32383.1	11.8323	384.083	7.98925	-2.62891	1.7743	4.92193	0.653848	0.0130312	9.41522e-07	1.00155	76.5956	2.32
	31A	25	119.902	0.102112	57.2888	14.6931	99.7764	5.19586	0.00457148	0.192057	0.000147053	7.02134e-06	1.4398e-06	349722	250.524	67053.5	18.0711	778.743	13.5654	6.78819	1.69059	2.57765	0.502176	0.0130312	9.41522e-07	1.00155	76.6519	2.32
X	32A	25	120.393	0.158543	10.6983	1.41744	98.7378	5.21786	0.00709975	0.189257	0.000155673	4.18193e-05	3.56329e-06	170901	124.153	32290.4	12.4369	387.051	8.30616	17.0878	2.25139	7.49532	0.607023	0.0130312	9.41522e-07	1.00155	76.6752	2.32
	33A	25	120.078	0.11909	19.8989	2.22355	99.5073	5.20375	0.00533209	0.191249	0.000148345	1.60364e-05	2.21891e-06	293067	210.498	55954.8	16.3417	663.629	11.0914	15.9907	1.76848	5.0203	0.649098	0.0130312	9.41522e-07	1.00155	76.6986	2.32
X	34A	25	120.485	0.126717	27.677	7.14875	99.6971	5.22198	0.00567484	0.190945	0.000148696	9.68092e-06	2.52411e-06	229652	162.499	43777.2	14.2047	514.554	12.9314	9.02415	2.29777	2.40051	0.577561	0.0130312	9.41522e-07	1.00156	76.755	2.32
	35A	25	119.942	0.112786	12.2526	0.84388	99.4241	5.19765	0.00504945	0.191313	0.000144304	1.88254e-05	2.0233e-06	346130	243.482	66108.8	17.9412	806.459	11.0638	30.5298	2.08928	7.14473	0.698804	0.0130312	9.41522e-07	1.00156	76.7784	2.32
X	36A	25	120.516	0.136921	13.3756	1.94852	99.8175	5.22335	0.00613192	0.191125	0.000150986	5.64684e-06	2.89929e-06	199612	142.046	38087.3	13.0391	441.718	13.699	16.1169	2.33159	1.45097	0.576562	0.0130312	9.41522e-07	1.00156	76.8017	2.32
	38A	25	120.144	0.131494	32.1742	8.5511	99.1222	5.20667	0.00588765	0.190402	0.000143734	2.89397e-05	2.77837e-06	263597	181.483	50104.8	15.4756	582.921	8.52446	8.89067	2.32401	7.79847	0.730595	0.0130312	9.41522e-07	1.00156	76.8815	2.32
	39A	25	119.917	0.104945	34.0754	4.69537	98.5958	5.19655	0.00469832	0.189759	0.000136244	4.65753e-05	1.77391e-06	505521	345.278	95765.9	21.1025	1136.08	19.1591	16.0553	2.17371	23.8568	0.895251	0.0130312	9.41522e-07	1.00156	76.9054	2.32
	40A	25	120.087	0.109028	11.5409	0.781141	98.9777	5.20414	0.00488159	0.190217	0.000138389	3.37796e-05	1.93537e-06	406337	278.379	77163.3	18.8231	925.742	14.6428	37.7446	2.53936	14.498	0.784399	0.0130312	9.41522e-07	1.00156	76.9288	2.32
Weighted mean Age ±2σ			120.013	0.0584025	n=21/34	MSWD=0.89
	Sample:	ZY18-04
	Material:	Sanidine			Location:	36°03'32.97"N, 119°50'37.18"E
														Corrected1
	N	Power	Age	±1σ	K/Ca	±1σ	%40Ar	40Ar*/39ArK	±1σ	39Ar/40Ar	±1σ	36Ar/40Ar	±1σ	40Ar	±1σ	39Ar	±1σ	38Ar	±1σ	37Ar	±1σ	36Ar	±1σ	J	±1σ	39Ar Decay	37Ar Decay	Ca/K
		%	(Ma)	(Ma)			(%)							(cps)		(cps)		(cps)		(cps)		(cps)
X	01A	20	120.591	0.100402	31.2232	6.40811	99.6045	3.07833	0.00264833	0.324133	0.000192738	7.4086e-06	2.07361e-06	322219	167.167	104117	29.6569	1242.22	10.217	31.3747	6.43913	2.76518	0.662143	0.0221256	3.70805e-06	1.00137	45.8743	2.32
	02A	20	120.316	0.0926136	33.7518	5.58431	99.4496	3.07109	0.00244253	0.324393	0.000187885	1.25988e-05	1.81189e-06	397981	203.804	128701	34.0489	1551.49	13.1412	35.8702	5.93475	5.44699	0.716002	0.0221256	3.70805e-06	1.00137	45.8832	2.32
X	03A	20	120.823	0.104236	21.3072	3.435	99.7399	3.08447	0.00274982	0.323927	0.000191826	2.86977e-06	2.22784e-06	295607	153.844	95458.3	26.4122	1111.83	14.3028	42.1216	6.79043	1.35403	0.651935	0.0221256	3.70805e-06	1.00137	45.9075	2.32
X	04A	20	120.797	0.112747	31.0139	7.67682	99.6881	3.08378	0.0029743	0.323831	0.000197619	4.6082e-06	2.49537e-06	276539	143.773	89273.9	28.0546	1028.85	8.64341	27.0585	6.69767	1.58977	0.683781	0.0221256	3.70805e-06	1.00137	45.9165	2.32
	05A	20	120.485	0.142563	78.6406	47.9847	99.4586	3.07554	0.00376021	0.323951	0.000269644	1.2306e-05	2.97956e-06	232846	176.261	75196	25.536	861.658	11.4328	8.98361	5.48157	2.9549	0.689156	0.0221256	3.70805e-06	1.00137	45.9413	2.32
	06A	20	120.414	0.126531	54.3145	21.9753	99.3867	3.07366	0.00333722	0.323915	0.000260532	1.47191e-05	2.4195e-06	302862	227.678	97796.6	27.2228	1158.32	13.5222	16.9132	6.84294	4.65071	0.726475	0.0221256	3.70805e-06	1.00137	45.9502	2.32
X	07A	20	120.78	0.150182	32.4761	11.0587	99.5024	3.08332	0.00396181	0.323275	0.000260602	1.08493e-05	3.33432e-06	204543	132.727	65918.4	31.2304	764.711	11.2944	19.056	6.48883	2.44028	0.675977	0.0221256	3.70805e-06	1.00137	45.9745	2.32
X	08A	20	120.764	0.123532	54.6388	26.5564	99.5565	3.0829	0.00325876	0.323495	0.000211051	9.02813e-06	2.77336e-06	243769	138.262	78613	24.9097	941.236	9.88498	13.5051	6.56394	2.36076	0.669882	0.0221256	3.70805e-06	1.00137	45.9834	2.32
	09A	20	120.314	0.141941	27.5172	7.7072	98.97	3.07105	0.00374346	0.32283	0.000226352	2.87197e-05	3.29978e-06	228222	132.388	73448.5	28.5747	864.291	9.04244	25.0409	7.01354	6.8452	0.746633	0.0221256	3.70805e-06	1.00137	46.0078	2.32
X	10A	20	120.707	0.121208	19.8526	3.25004	99.3264	3.08141	0.00319735	0.322903	0.000229061	1.67597e-05	2.51432e-06	282002	168.926	90777.4	34.0381	1069.51	11.7144	42.889	7.02115	5.24065	0.702343	0.0221256	3.70805e-06	1.00137	46.0167	2.32
	11A	20	120.428	0.136291	9.03134	0.835939	98.1664	3.07403	0.00359468	0.319893	0.000209024	5.57352e-05	3.17444e-06	228939	126.493	73011.7	25.1009	859.748	9.43436	75.786	7.01445	13.6714	0.720143	0.0221256	3.70805e-06	1.00137	46.0411	2.32
	12A	20	120.508	0.141191	28.5939	7.59326	99.1903	3.07614	0.00372408	0.323013	0.00025829	2.13268e-05	3.01149e-06	231903	167.217	74675.5	25.345	895.271	12.1376	24.4782	6.50024	5.23814	0.692385	0.0221256	3.70805e-06	1.00137	46.0499	2.32
X	13A	20	120.883	0.130222	36.2098	11.9837	99.5547	3.08605	0.00343545	0.323159	0.00021158	9.09517e-06	3.0031e-06	236563	128.686	76210.2	27.3937	888.245	9.57625	19.7167	6.52519	2.38118	0.704463	0.0221256	3.70805e-06	1.00138	46.0743	2.32
	14A	20	120.411	0.122482	252.486	387.751	98.4081	3.0736	0.00323044	0.320726	0.000262502	4.7611e-05	2.13237e-06	369596	284.055	118172	32.3357	1410	13.3549	4.38371	6.73219	17.6124	0.782091	0.0221256	3.70805e-06	1.00138	46.0832	2.32
X	15A	20	120.621	0.13949	38.7211	14.8783	98.9671	3.07914	0.00367943	0.321971	0.000204771	2.88339e-05	3.34946e-06	226355	122.147	72653.7	24.0802	851.656	11.6213	17.5648	6.74911	6.72401	0.752098	0.0221256	3.70805e-06	1.00138	46.1076	2.32
	16A	20	120.375	0.104027	30.4053	4.21301	99.2995	3.07265	0.00274363	0.323737	0.000246734	1.76481e-05	1.52988e-06	463333	328.53	149532	40.6829	1783.09	14.6873	45.9383	6.36522	8.72591	0.703041	0.0221256	3.70805e-06	1.00138	46.2079	2.32
X	17A	20	120.85	0.126208	110.002	108.721	99.2466	3.08518	0.00332951	0.322248	0.000200692	1.94483e-05	2.9274e-06	247665	130.632	79561.6	25.9364	952.057	12.0992	6.75478	6.67611	4.88826	0.718875	0.0221256	3.70805e-06	1.00138	46.2168	2.32
X	18A	20	120.623	0.120958	61.4312	32.4271	99.4272	3.07918	0.0031906	0.323466	0.000198017	1.33694e-05	2.78331e-06	254834	134.2	82173.6	25.2039	968.618	8.7746	12.4859	6.5908	3.54759	0.703184	0.0221256	3.70805e-06	1.00138	46.2413	2.32
X	19A	20	120.734	0.115092	81.1471	47.9232	99.2956	3.08211	0.00303606	0.322729	0.000196468	1.77985e-05	2.57274e-06	297179	155.138	95610.4	29.4311	1128.13	12.9424	10.9958	6.49376	5.40688	0.758841	0.0221256	3.70805e-06	1.00138	46.2503	2.32
X	20A	20	120.684	0.124174	20.2537	3.45578	99.3918	3.08079	0.00327554	0.323181	0.000206044	1.45626e-05	2.83115e-06	250291	136.514	80638.5	26.195	956.304	12.3646	37.136	6.33619	4.09555	0.702865	0.0221256	3.70805e-06	1.00138	46.2749	2.32
X	21A	20	120.87	0.111867	18.5783	2.82307	99.4496	3.0857	0.00295121	0.322853	0.00020367	1.2628e-05	2.39225e-06	276101	148.427	88864	28.8692	1070.29	11.3573	44.606	6.778	4.03594	0.653824	0.0221256	3.70805e-06	1.00138	46.2838	2.32
	22A	20	120.42	0.12102	42.1797	14.883	99.1567	3.07384	0.00319188	0.323146	0.000204157	2.24504e-05	2.7324e-06	259906	140.885	83726.6	26.7242	986.714	13.7135	18.5015	6.52816	6.0465	0.70414	0.0221256	3.70805e-06	1.00138	46.3083	2.32
X	23A	20	120.696	0.110147	13.4984	1.53523	99.5528	3.0811	0.00290556	0.323673	0.000202078	9.1503e-06	2.35563e-06	278001	149.638	89702.7	27.8859	1073.12	11.581	61.9269	7.04303	3.30949	0.647697	0.0221256	3.70805e-06	1.00138	46.3173	2.32
	24A	20	120.401	0.108331	14.4077	1.51415	99.097	3.07334	0.00285719	0.323004	0.000199883	2.44564e-05	2.29587e-06	302880	157.944	97528.7	31.9965	1158.63	10.47	63.0469	6.62559	8.17553	0.68912	0.0221256	3.70805e-06	1.00138	46.3419	2.32
	26A	20	120.277	0.11886	29.4982	6.83558	99.3033	3.07006	0.00313466	0.324023	0.000194171	1.75157e-05	2.74778e-06	256561	131.312	82873.3	25.3856	963.96	10.1261	26.1479	6.05915	4.79966	0.699577	0.0221256	3.70805e-06	1.00138	46.3755	2.32
	30A	20	120.482	0.133603	350.492	1129.03	98.8855	3.07545	0.00352387	0.322091	0.00022524	3.15697e-05	2.99822e-06	235805	136.414	75714.3	29.3855	908.548	10.825	2.00766	6.46724	7.45305	0.701015	0.0221256	3.70805e-06	1.00138	46.4428	2.32
X	31A	20	120.599	0.107491	237.607	392.88	99.2319	3.07854	0.00283535	0.322896	0.000200234	1.99309e-05	2.25755e-06	315682	169.957	101615	30.7068	1208.89	15.0203	3.9738	6.57062	6.32275	0.706559	0.0221256	3.70805e-06	1.00138	46.4519	2.32
	32A	20	120.264	0.150766	50.6466	28.2186	99.2559	3.0739	0.00398153	0.323463	0.000201631	1.91162e-05	3.77532e-06	223710	115.216	72134.6	24.9787	831.705	9.40813	12.1253	6.75575	4.42012	0.837945	0.0220955	6.16852e-06	1.00141	50.7018	2.32
	33A	20	120.186	0.137052	27.9368	7.93346	99.2656	3.07184	0.00361921	0.323712	0.000195644	1.87848e-05	3.36221e-06	250579	128.028	80860.9	25.6841	930.874	13.5987	24.6362	6.99606	5.01908	0.835476	0.0220955	6.16852e-06	1.00141	50.7116	2.32
	34A	20	120.426	0.145701	53.8437	27.0905	99.154	3.07818	0.0038481	0.322681	0.000201993	2.25493e-05	3.5927e-06	242915	131.702	78137.8	24.0204	916.153	10.3112	12.3456	6.21144	5.62624	0.866961	0.0220955	6.16852e-06	1.00141	50.7382	2.32
	35A	20	120.12	0.126424	76.195	46.3087	99.0064	3.07009	0.00333842	0.323049	0.000196053	2.74934e-05	2.98752e-06	291237	155.166	93788.4	26.7129	1099.25	15.0683	10.4695	6.36297	8.12324	0.864084	0.0220955	6.16852e-06	1.00141	50.748	2.32
	36A	20	120.146	0.174481	26.0502	7.65604	98.2794	3.0708	0.00460752	0.320599	0.000284455	5.19308e-05	3.95972e-06	221160	179.168	70682.3	25.1083	825.509	8.83098	23.0659	6.77887	11.7701	0.869143	0.0220955	6.16852e-06	1.00141	50.7747	2.32
	37A	20	120.089	0.123707	49.4003	14.0578	98.315	3.06928	0.00326663	0.320875	0.000273183	5.0731e-05	2.05259e-06	445271	359.391	142429	37.3735	1699.4	13.9565	24.5053	6.97342	22.8755	0.907091	0.0220955	6.16852e-06	1.00141	50.7845	2.32
	38A	20	120.17	0.130235	28.1839	6.90508	98.8023	3.07141	0.00343916	0.322244	0.000199639	3.4357e-05	3.07982e-06	284836	154.47	91499.2	26.887	1086.75	11.6176	27.5788	6.75677	10.1395	0.870709	0.0220955	6.16852e-06	1.00141	50.8113	2.32
	39A	20	120.209	0.136701	113.041	114.236	98.5486	3.07244	0.00360997	0.321307	0.000200212	4.28862e-05	3.27945e-06	264966	143.971	84868.6	25.4142	1005.84	10.042	6.37663	6.44405	11.4227	0.862828	0.0220955	6.16852e-06	1.00141	50.8211	2.32
	40A	20	120.132	0.110652	14.2785	1.18781	98.7888	3.07042	0.00292195	0.322304	0.000230929	3.48087e-05	2.0498e-06	411873	274.824	132334	33.5605	1575.25	13.6627	78.6738	6.54459	15.3819	0.837854	0.0220955	6.16852e-06	1.00141	50.8478	2.32
	41A	20	120.447	0.161437	254.186	698.154	98.2857	3.07874	0.00426376	0.319791	0.000241595	5.17353e-05	3.80516e-06	222275	150.96	70859.1	23.0174	827.672	11.4889	2.36598	6.49845	11.5006	0.839497	0.0220955	6.16852e-06	1.00141	50.8576	2.32
	43A	20	120.128	0.118196	18.9999	2.30129	99.2457	3.07031	0.00312117	0.323808	0.000249561	1.94521e-05	2.19102e-06	389940	281.098	125870	33.3498	1514.55	16.1728	56.1849	6.80505	8.34033	0.847629	0.0220955	6.16852e-06	1.00141	50.8942	2.32
	44A	20	120.201	0.141707	14.0685	2.02719	98.4381	3.07225	0.00374216	0.320966	0.000200942	4.66014e-05	3.43643e-06	243428	129.993	77888.6	25.0451	924.528	14.8345	46.9252	6.76149	11.9627	0.829783	0.0220955	6.16852e-06	1.00141	50.9254	2.32
	45A	20	120.139	0.0975362	52.0578	14.9182	99.2917	3.0706	0.00257562	0.323928	0.000202989	1.79072e-05	1.84692e-06	449282	245.456	145077	43.7136	1738.29	11.1337	23.6165	6.76774	8.34901	0.82301	0.0220955	6.16852e-06	1.00141	50.9352	2.32
	46A	20	120.236	0.113897	45.5317	15.9707	98.9961	3.07316	0.00300782	0.322692	0.000187334	2.78462e-05	2.60692e-06	321903	163.522	103549	28.5013	1253.32	12.7325	19.2586	6.7551	9.21235	0.832454	0.0220955	6.16852e-06	1.00141	50.9719	2.32
	48A	20	120.445	0.127582	40.6153	12.8584	98.8444	3.07869	0.00336961	0.321618	0.000235592	3.29559e-05	2.67749e-06	295452	197.46	94725	27.7845	1138.93	11.0835	19.7358	6.2481	9.98828	0.7849	0.0220955	6.16852e-06	1.00141	51.0085	2.32
X	49A	20	120.619	0.110197	11.3174	0.982582	99.2567	3.08327	0.00291072	0.322481	0.000188297	1.91078e-05	2.46255e-06	326446	165.794	104944	29.6415	1255.66	10.7395	78.4251	6.80872	7.30229	0.796909	0.0220955	6.16852e-06	1.00141	51.0354	2.32
	50A	20	120.346	0.149022	12.1715	1.59605	98.5983	3.07608	0.00393563	0.321088	0.000201942	4.12235e-05	3.6744e-06	230053	118.31	73637.1	26.3118	866.78	9.6592	51.158	6.70816	10.1632	0.838677	0.0220955	6.16852e-06	1.00141	51.0452	2.32
	51A	20	120.17	0.0990654	34.3107	7.0412	98.9851	3.07142	0.00261605	0.32284	0.000185001	2.82119e-05	2.08005e-06	407030	207.322	130993	33.5897	1566.68	13.4976	32.2669	6.6217	11.9004	0.840125	0.0220955	6.16852e-06	1.00141	51.072	2.32
	54A	20	120.238	0.17539	79.7793	71.3509	97.8356	3.07322	0.00463174	0.318897	0.000266882	6.68533e-05	4.08294e-06	216195	160.142	68728.8	26.3784	802.58	13.7145	7.27432	6.50579	14.5175	0.876464	0.0220955	6.16852e-06	1.00141	51.1186	2.32
	55A	20	120.246	0.134127	22.827	4.77493	98.6988	3.07343	0.00354208	0.321693	0.000254497	3.78413e-05	2.74976e-06	241181	174.596	77343.5	24.1636	888.143	9.05524	28.5948	5.98137	9.48822	0.656776	0.0220955	6.16852e-06	1.00141	51.1455	2.32
	56A	20	120.401	0.157918	13.2982	1.96445	98.9255	3.07751	0.00417072	0.322005	0.00026395	3.02275e-05	3.56534e-06	190447	139.457	61133.7	22.1552	707.415	10.1765	38.7894	5.72994	6.27088	0.673121	0.0220955	6.16852e-06	1.00141	51.1553	2.32
X	57A	20	120.78	0.157111	24.0453	4.8339	99.1733	3.08752	0.00415025	0.321765	0.000231091	2.1919e-05	3.7732e-06	290920	170.329	93314.7	38.3837	1121.76	11.0256	32.728	6.5793	6.81468	1.09193	0.0220955	6.16852e-06	1.00141	51.1822	2.32
	58A	20	120.374	0.150183	25.0294	6.41252	98.1845	3.0768	0.00396638	0.319663	0.000233129	5.51326e-05	3.48193e-06	243450	142.739	77579.3	33.3016	921.127	10.7527	26.1344	6.69555	13.7529	0.841031	0.0220955	6.16852e-06	1.00141	51.1921	2.32
	59A	20	120.413	0.103382	26.9672	3.74275	98.1827	3.07784	0.00273041	0.319549	0.000206829	5.51949e-05	1.96794e-06	472501	264.372	150516	48.1735	1816.57	16.029	47.0365	6.52806	26.6814	0.923649	0.0220955	6.16852e-06	1.00141	51.2192	2.32
	60A	20	120.393	0.125592	47.7064	17.6519	98.6957	3.0773	0.00331693	0.321278	0.000225739	3.79518e-05	2.68967e-06	306679	177.058	98220.4	38.8728	1150.41	12.6665	17.3473	6.41865	11.8443	0.818535	0.0220955	6.16852e-06	1.00141	51.2292	2.32
	62A	20	120.208	0.113283	49.6676	16.513	97.2772	3.07242	0.00299156	0.317157	0.000187535	8.56176e-05	2.49222e-06	368505	190.812	116510	32.614	1402.04	11.6579	19.7506	6.56646	31.7647	0.912086	0.0220955	6.16852e-06	1.00141	51.2663	2.32
	64A	20	120.234	0.100979	26.4268	4.42994	98.8561	3.0731	0.00266668	0.322242	0.000183473	3.25518e-05	2.15791e-06	406515	206.279	130585	32.9148	1554.76	11.87	41.5743	6.96903	13.7756	0.870259	0.0220955	6.16852e-06	1.00141	51.3033	2.32
X	66A	20	120.601	0.143083	77.9748	64.0325	99.0723	3.08281	0.00377931	0.321929	0.000211594	2.53022e-05	3.43093e-06	222895	122.865	71530.8	25.2518	816.016	12.4433	7.71259	6.33351	5.71883	0.758266	0.0220955	6.16852e-06	1.00141	51.3408	2.32
	67A	20	120.357	0.160904	77.3073	67.5241	99.0918	3.07637	0.00424947	0.322667	0.000207244	2.46369e-05	4.05824e-06	219788	122.29	70695.4	22.2964	825.181	11.1399	7.68426	6.7118	5.50079	0.885443	0.0220955	6.16852e-06	1.00141	51.3681	2.32
	68A	20	120.064	0.120317	42.3106	9.14655	98.7231	3.06863	0.00317705	0.322277	0.000262092	3.70136e-05	2.08672e-06	422036	324.486	135586	34.8073	1634.26	14.3642	26.9222	5.81989	15.9636	0.875264	0.0220955	6.16852e-06	1.00141	51.378	2.32
	70A	20	120.448	0.155011	67.3561	47.3893	96.4988	3.07877	0.00409404	0.313965	0.000198561	0.000111788	3.75608e-06	249110	134.256	77969.4	25.4108	910.437	10.0473	9.71804	6.83723	27.9216	0.929061	0.0220955	6.16852e-06	1.00141	51.4153	2.32
Weighted mean Age ±2σ			120.292	0.078	n=40/58	MSWD=1.02
Notes:
1Corrected: Isotopic intensities corrected for blank, baseline, radioactive decay and detector intercalibration, not for interfering reactions.
Interfering factors (1σ): (40Ar/39Ar)K: 0.0054 ± 0.00014; (38Ar/39Ar)K: 0.0121 ± 0.00002; (39Ar/37Ar)Ca: 0.000702 ± 0.000012; (38Ar/37Ar)Ca: 0.000020 ± 0.000001; (36Ar/37Ar)Ca: 0.000270 ± 0.0000004; (36Ar/38Ar)Cl: 263.000
X symbol preceding sample ID denotes analyses excluded from weighted-mean age calculations.
pX symbol preceding sample ID denotes analyses excluded from weighted mean age calculations.
Errors quoted for individual analyses include analytical error only, without interfering reaction or J uncertainties.
Decay constants and isotopic abundances after Min et al. (2000)
Ages calculated relative to 28.201 Ma FC-2 Fish Canyon Tuff sanidine standard (Kuiper et al., 2008)
Rederences
Kuiper, K.F., Deino, A., Hilgen, F.J., Krijgsman, W., Renne, P.R., and Wijbrans, J.R., 2008, Synchronizing rock clocks of Earth history: Science, v. 320, p. 500–504, https://doi.org/10.1126/science.1154339
Min, K., Mundil, R., Renne, P.R., and Ludwig, K.R., 2000, A test for systematic errors in 40Ar/39Ar geochronology through comparison with U/Pb analysis of a: 1.1-Ga Rhyolite: Geochimica Et Cosmochimica Acta, v. 64, p. 73–98, https://doi.org/10.1016/S0016-7037(99)00204-5
